# Supplementary material for: TLR9/MyD88/TRIF signaling activates host immune inhibitory CD200 in Leishmania infection
Source: JCI journal article supplement (doi:10.1172/jci.insight.126207), 2019-05-15
Supplement: sd1 [file 1]

## Supplementary figure 1

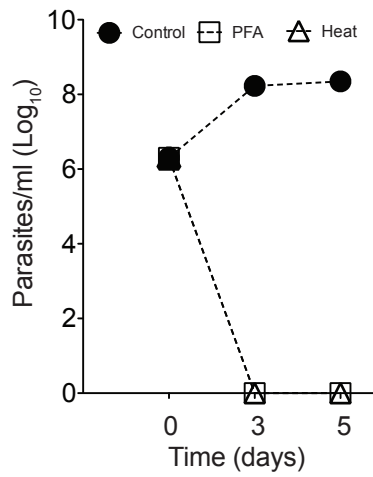

**Supplementary figure 1. Viability of *L. amazonensis* amastigotes after PFA or heat inactivation.** Axenic amastigotes of *L. amazonensis* were treated as described in figure 1D. After washes, the samples were incubated in complete promastigote media at 26° C and counted on the 3<sup>rd</sup> and 5<sup>th</sup> day of culture. Graph corresponds to the number of promastigotes per ml as a representative result of 3 independent assays.

## Supplementary figure 2

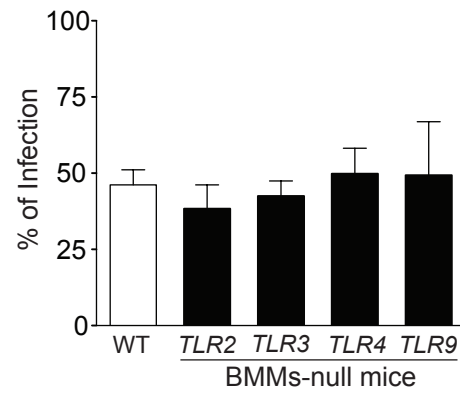

**Supplementary figure 2. *L. amazonensis* infection in BMMs from WT or *TLR*<sup>-/-</sup> mice.** Percentage of infection for the experiment in Figure 2B. Data correspond to the mean  $\pm$  SD of triplicates. Results represent 3 independent experiments. No statistical differences were observed by using the Student *t*-test.

## Supplementary figure 3

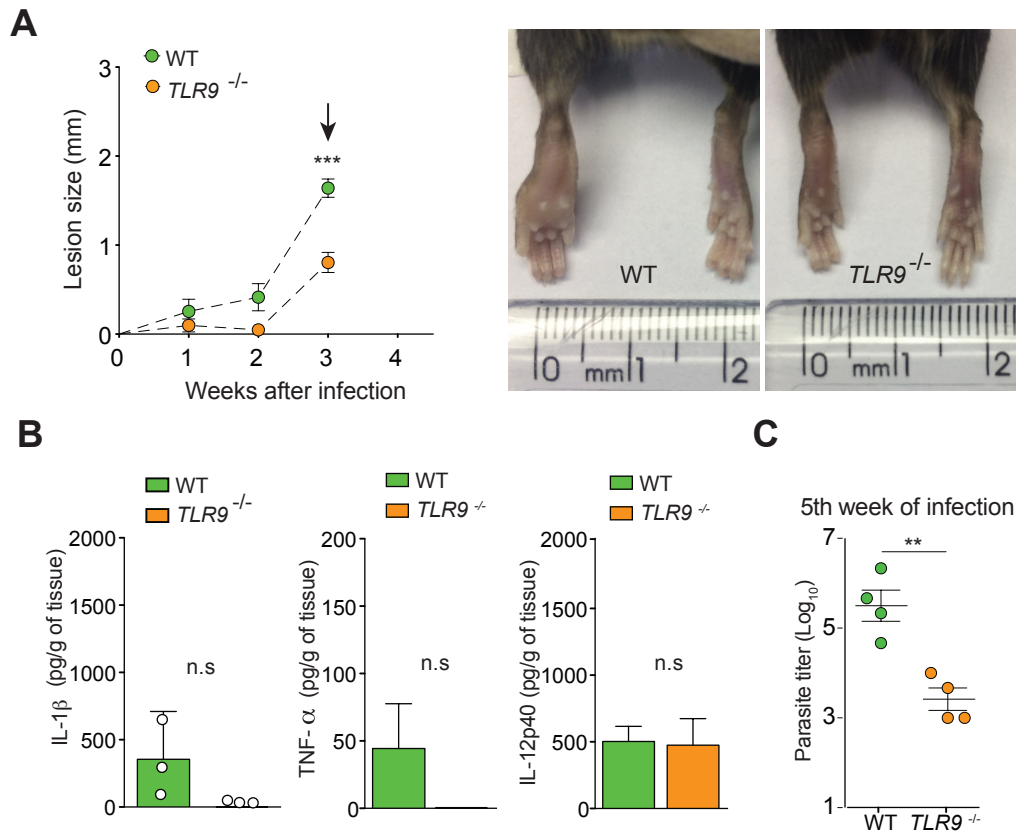

**Supplementary figure 3. Progression of *L. amazonensis* lesions in WT and *TLR9*<sup>-/-</sup> mice.** (A) Lesion size (mm) expressed as the mean  $\pm$  SD from at least n=5 mice per group. The arrow indicates the week of sacrifice of mice for parasite load determination (shown in Fig. 4C). Representative image of the lesion from WT or *TLR9*<sup>-/-</sup> mice infected by *L. amazonensis* on the left footpad compared to the non-infected footpad (right). (B) Detection of IL-1 $\beta$ , TNF- $\alpha$  and IL-12p40 in the footpad homogenates at the third week of *Leishmania* infection and quantified by ELISA. Results correspond to the mean  $\pm$  SD (n=4). n.s: not significant; (Student's *t*-test). (C) Parasite load in the footpads of WT and *TLR9*<sup>-/-</sup> mice infected with *L. amazonensis* at the fifth week of infection. Results correspond to mean  $\pm$  SD (n=4). \*\*p= 0.0028 (Student's *t*-test).

## Supplementary figure 4

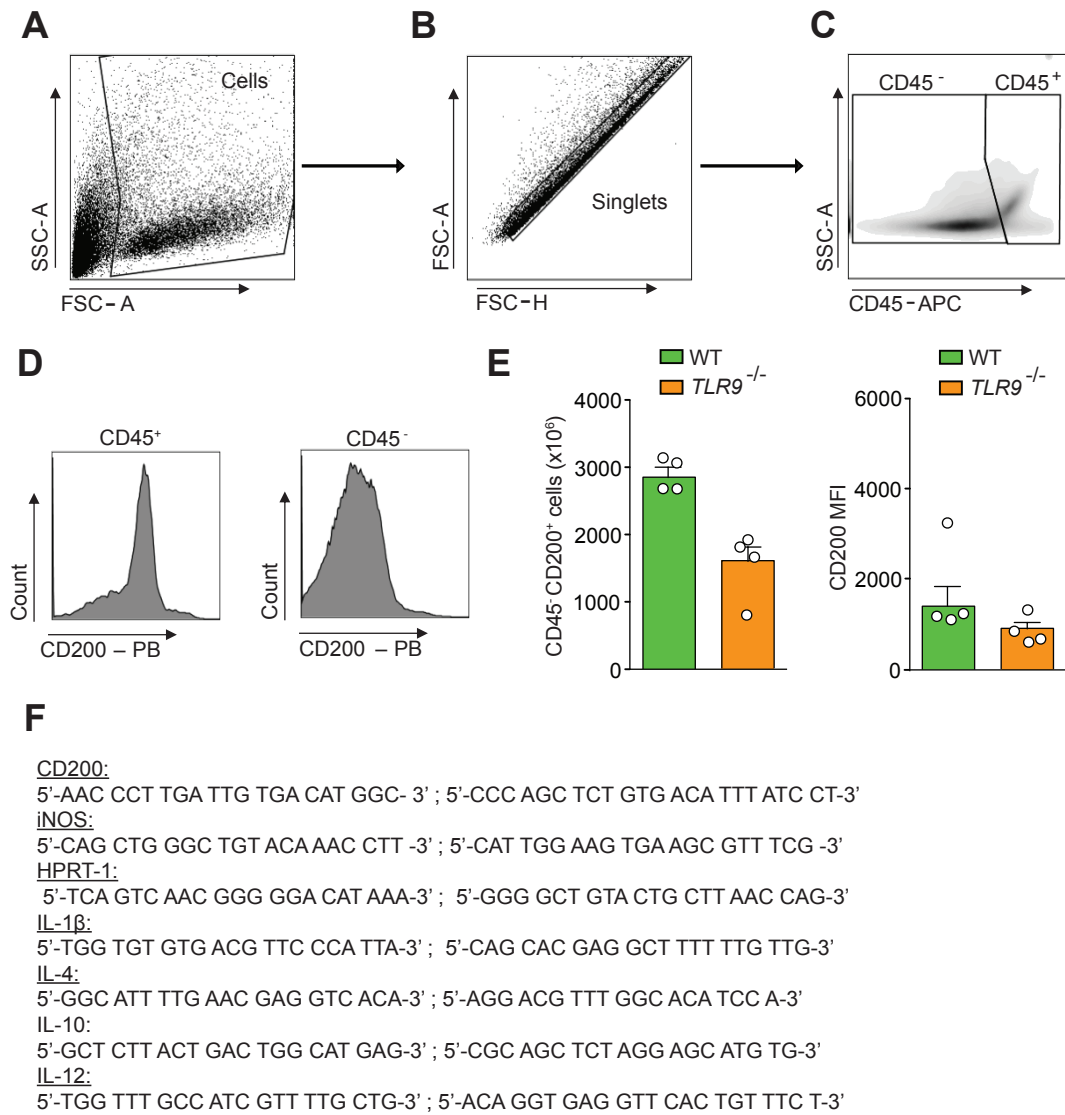

**Supplementary figure 4. Gating strategy for macrophage immunophenotyping in the lesion of *L. amazonensis*-infected mice.** Lesions were processed as described in the Methods and the resulting cells were evaluated by flow cytometry. **(A)** Debris exclusion based on forward versus side scatter parameters (FSC and SSC). **(B)** Single cell events (singlets) were selected based on FSC-H versus FSC-A parameters. **(C)** CD45<sup>+</sup> and CD45<sup>-</sup> cells were gated for evaluation of CD200<sup>+</sup> in the entire population **(D)**. **(E)** CD45-CD200<sup>+</sup> cells were obtained from the total number of cells (absolute population), analyzing the median fluorescence intensity (MFI). **(F)** List of oligonucleotide primers used for the qPCR.

## Supplemental Table 1

### Antibodies used in the study:

|                                            |                                       |
|--------------------------------------------|---------------------------------------|
| rabbit anti-mouse iNOS mAb                 | Abcam, ab136918                       |
| rabbit anti-mouse actin mAb                | Imuny-VBP Biotecnologia Ltda, IM-0075 |
| goat anti-mouse CD200                      | R&D Systems, AF2554                   |
| Anti-mouse CD200                           | BD Biosciences, clone OX-90           |
| Anti-mouse CD45                            | Biolegend clone, 30-F11               |
| Anti-mouse CD11b                           | BD Biosciences clone, M1/70           |
| Anti-mouse CD11c                           | Biolegend, clone N418                 |
| Anti-mouse MHC class II                    | BD Biosciences, clone 2G9             |
| Anti-mouse F4/80                           | eBiosciences, clone BM8               |
| Anti-rabbit IgG conjugated Alexa Fluor 488 | Thermo Fischer Scientific, A11070     |
| Anti-IgG rabbit peroxidase-conjugated      | Imuny-VBP Biotecnologia Ltda, IC-3R01 |
| Anti-IgG mouse peroxidase-conjugated       | Imuny-VBP Biotecnologia Ltda, IC-1G01 |
